# Supplementary material for: Predictors of gallstone composition in 1025 symptomatic gallstones from Northern Germany
Source: Springer Nature journal article supplement (doi:10.1186/1471-230x-6-36), 2006-11-22

The following list provides the composition of the depicted stones.

| Number | Spectrum A        |              |                    | Spectrum B     |              |             |
|--------|-------------------|--------------|--------------------|----------------|--------------|-------------|
|        | Main              | Intermediate | Trace              | Main           | Intermediate | trace       |
| 1      | Cholesterol       | Bilirubin    |                    | Cholesterol    |              |             |
| 2      | Cholesterol       |              |                    | Cholesterol    |              | Bilirubin   |
| 3      | Cholesterol       |              |                    | Cholesterol    |              |             |
| 4      | Cholesterol       |              | Bilirubin, Apatite | Cholesterol    | Bilirubin    | Apatite     |
| 5      | Cholesterol       |              |                    | Cholesterol    |              |             |
| 6      | Cholesterol       |              |                    | Cholesterol    |              |             |
| 7      | Cholesterol       |              |                    | Cholesterol    |              |             |
| 8      | Cholesterol       |              | Bilirubin          | Cholesterol    |              | Bilirubin   |
| 9      | Cholesterol       |              |                    | Cholesterol    |              |             |
| 10     | Cholesterol       |              |                    | Cholesterol    |              |             |
| 11     | CaCO <sub>3</sub> |              |                    | Cholesterol    |              |             |
| 12     | Polysaccharide    |              |                    | Polysaccharide |              |             |
| 13     | Cholesterol       |              |                    | Cholesterol    |              |             |
| 14     | Aragonite         |              |                    | Aragonite      |              |             |
| 15     | Cholesterol       |              |                    | Cholesterol    |              |             |
| 16     | Bilirubin         |              | Cholesterol        | Bilirubin      |              | Cholesterol |
| 17     | Aragonite         |              | Bilirubin          | Aragonite      |              | Bilirubin   |
| 18     | Cholesterol       | Bilirubin    |                    | Cholesterol    | Bilirubin    |             |

Supplemental Figure 1

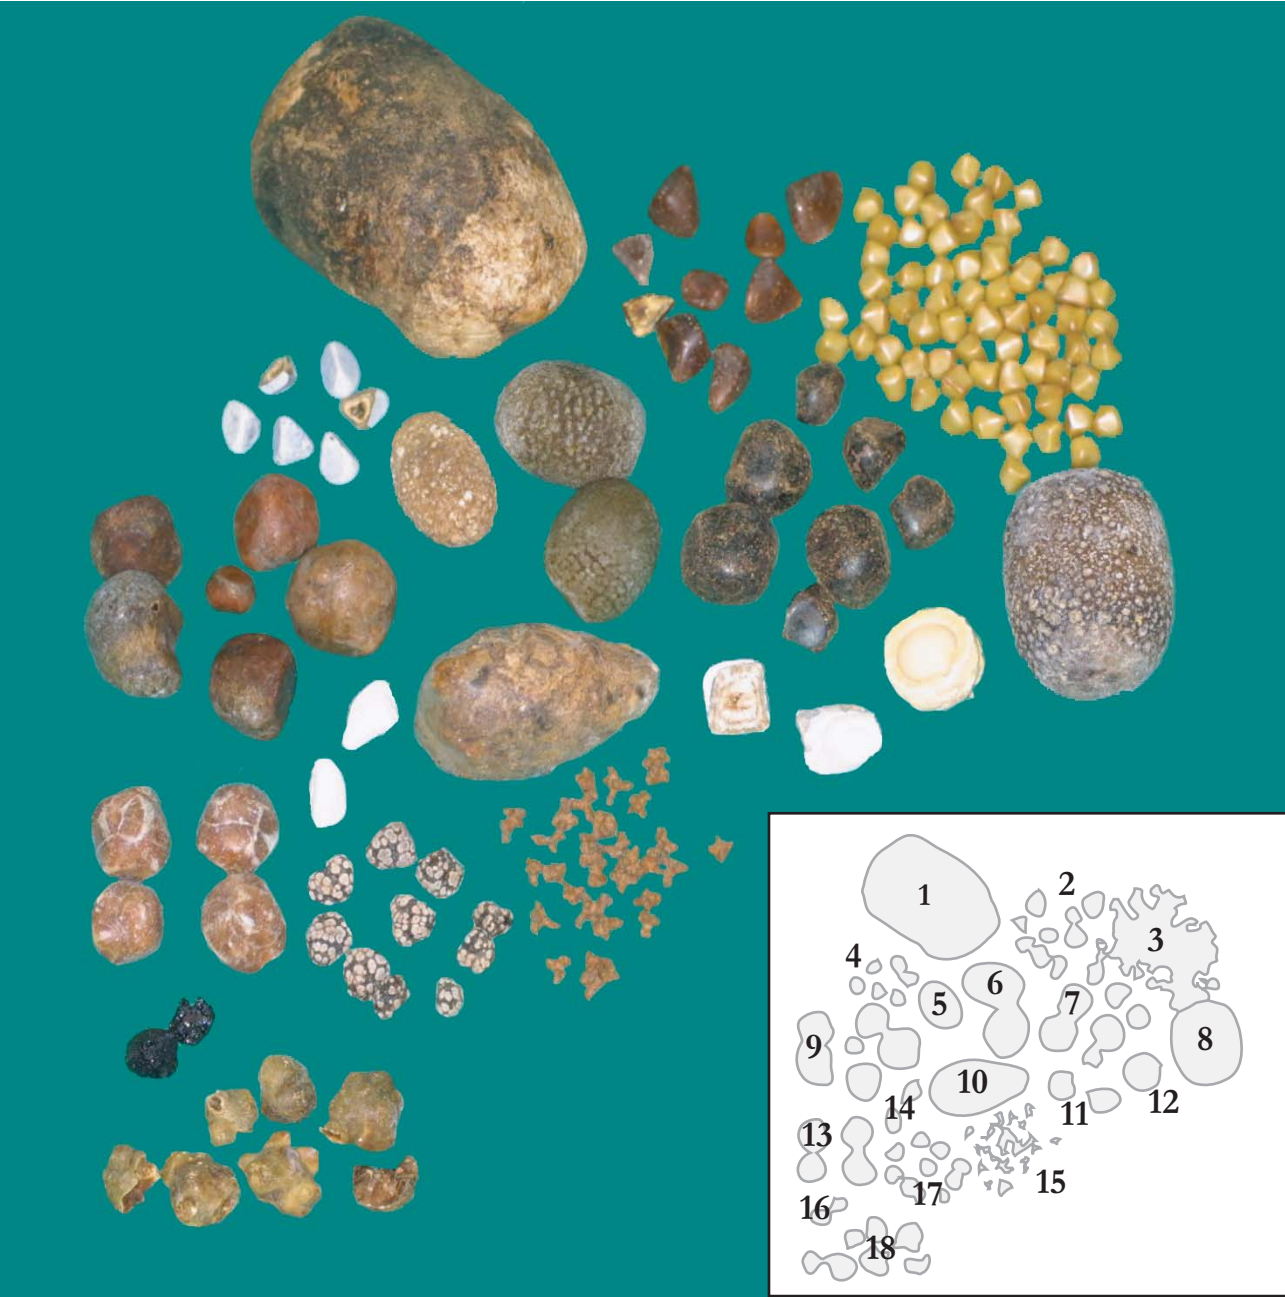

Supplement: Additional file 1 [file 1471-230x-6-36-s1.pdf]
